# Supplementary material
Source: PubMed Central journal article supplement (PMC1450189)
Supplement: pnas_0600433103_1.pdf [file pnas_0600433103_1.pdf]

**Table 4. The number of GroES pattern matches found in GroEL substrate proteins from *E. coli* (1).**

| No. | Swiss-Prot ID | Protein                                                                                                                                                                                                                                                    | Seq. length | GroES repeats |    |    |
|-----|---------------|------------------------------------------------------------------------------------------------------------------------------------------------------------------------------------------------------------------------------------------------------------|-------------|---------------|----|----|
|     |               |                                                                                                                                                                                                                                                            |             | 6             | 5  | 4  |
| 1   | ATDA_ECOLI    | Spermidine N(1)-acetyltransferase (EC 2.3.1.57) (Diamine acetyltransferase) (SAT)                                                                                                                                                                          | 185         | 1             | 2  | 2  |
| 2   | EFTU_ECOLI    | Elongation factor Tu (EF-Tu) (P-43)                                                                                                                                                                                                                        | 393         | 0             | 4  | 7  |
| 3   | FABZ_ECOLI    | (3R)-hydroxymyristoyl-[acyl carrier protein] dehydratase (EC 4.2.1.-) ((3R)-hydroxymyristoyl ACP dehydrase) (17 kDa actomyosin component)                                                                                                                  | 151         | 1             | 3  | 7  |
| 4   | FUR_ECOLI     | Ferric uptake regulation protein (Ferric uptake regulator)                                                                                                                                                                                                 | 148         | 1             | 1  | 2  |
| 5   | GLMS_ECOLI    | Glucosamine-fructose-6-phosphate aminotransferase [isomerizing] (EC 2.6.1.16) (Hexosephosphate aminotransferase) (D-fructose-6-phosphate amidotransferase) (GFAT) (L-glutamine-D-fructose-6-phosphate amidotransferase) (Glucosamine-6-phosphate synthase) | 608         | 4             | 10 | 19 |
| 6   | HDFR_ECOLI    | HTH-type transcriptional regulator hdfR (H-NS-dependent fhDC regulator)                                                                                                                                                                                    | 279         | 1             | 2  | 3  |
| 7   | HFQ_ECOLI     | Hfq protein (Host factor-I protein) (HF-I) (HF-1)                                                                                                                                                                                                          | 101         | 1             | 2  | 3  |
| 8   | MPL_ECOLI     | UDP-N-acetylmuramate:L-alanyl-gamma-D-glutamyl-meso-diaminopimelate ligase (EC 6.3.2.-) (Murein peptide ligase)                                                                                                                                            | 457         | 2             | 4  | 11 |
| 9   | PURU_ECOLI    | Formyltetrahydrofolate deformylase (EC 3.5.1.10) (Formyl-FH(4) hydrolase)                                                                                                                                                                                  | 280         | 2             | 3  | 9  |
| 10  | RL1_ECOLI     | 50S ribosomal protein L1                                                                                                                                                                                                                                   | 233         | 0             | 0  | 1  |
| 11  | RL11_ECOLI    | 50S ribosomal protein L11                                                                                                                                                                                                                                  | 141         | 0             | 0  | 1  |

TABLE 4: (continued)

| No. | Swiss-Prot ID | Protein                                                                                                                                                                                         | Seq. length | GroES repeats |   |   |
|-----|---------------|-------------------------------------------------------------------------------------------------------------------------------------------------------------------------------------------------|-------------|---------------|---|---|
|     |               |                                                                                                                                                                                                 |             | 6             | 5 | 4 |
| 12  | RL14_ECOLI    | 50S ribosomal protein L14                                                                                                                                                                       | 123         | 0             | 1 | 1 |
| 13  | RL15_ECOLI    | 50S ribosomal protein L15                                                                                                                                                                       | 144         | 0             | 0 | 0 |
| 14  | RL17_ECOLI    | 50S ribosomal protein L17                                                                                                                                                                       | 127         | 0             | 0 | 2 |
| 15  | RL2_ECOLI     | 50S ribosomal protein L2                                                                                                                                                                        | 272         | 0             | 0 | 1 |
| 16  | RL28_ECOLI    | 50S ribosomal protein L28                                                                                                                                                                       | 77          | 0             | 1 | 1 |
| 17  | RL32_ECOLI    | 50S ribosomal protein L32                                                                                                                                                                       | 56          | 0             | 0 | 0 |
| 18  | RL9_ECOLI     | 50S ribosomal protein L9                                                                                                                                                                        | 149         | 0             | 0 | 2 |
| 19  | RS1_ECOLI     | 30S ribosomal protein S1                                                                                                                                                                        | 557         | 0             | 1 | 7 |
| 20  | RS12_ECOLI    | 30S ribosomal protein S12                                                                                                                                                                       | 123         | 0             | 1 | 1 |
| 21  | RS15_ECOLI    | 30S ribosomal protein S15                                                                                                                                                                       | 88          | 0             | 0 | 1 |
| 22  | RS19_ECOLI    | 30S ribosomal protein S19                                                                                                                                                                       | 91          | 0             | 0 | 0 |
| 23  | RS2_ECOLI     | 30S ribosomal protein S2                                                                                                                                                                        | 240         | 0             | 1 | 5 |
| 24  | RS20_ECOLI    | 30S ribosomal protein S20                                                                                                                                                                       | 86          | 0             | 0 | 0 |
| 25  | RS3_ECOLI     | 30S ribosomal protein S3                                                                                                                                                                        | 232         | 0             | 2 | 4 |
| 26  | RS4_ECOLI     | 30S ribosomal protein S4                                                                                                                                                                        | 205         | 1             | 2 | 3 |
| 27  | RS5_ECOLI     | 30S ribosomal protein S5                                                                                                                                                                        | 166         | 1             | 2 | 4 |
| 28  | RS7_ECOLI     | 30S ribosomal protein S7                                                                                                                                                                        | 178         | 0             | 1 | 4 |
| 29  | RS9_ECOLI     | 30S ribosomal protein S9                                                                                                                                                                        | 129         | 0             | 1 | 2 |
| 30  | RSUA_ECOLI    | Ribosomal small subunit pseudouridine synthase A (EC 5.4.99.-) (16S pseudouridylate 516 synthase) (16S pseudouridine 516 synthase) (rRNA-uridine isomerase A) (rRNA pseudouridylate synthase A) | 231         | 0             | 4 | 6 |
| 31  | SLYD_ECOLI    | FKBP-type peptidyl-prolyl cis-trans isomerase slyD (EC 5.2.1.8) (PPIase) (Rotamase) (Histidine-rich protein) (WHP)                                                                              | 196         | 1             | 1 | 1 |

TABLE 4: (continued)

| No. | Swiss-Prot ID | Protein                                                                                                                                                                                             | Seq. length | GroES repeats |   |   |
|-----|---------------|-----------------------------------------------------------------------------------------------------------------------------------------------------------------------------------------------------|-------------|---------------|---|---|
|     |               |                                                                                                                                                                                                     |             | 6             | 5 | 4 |
| 32  | YBHA_ECOLI    | Phosphatase ybhA (EC 3.1.3.-)                                                                                                                                                                       | 272         | 2             | 5 | 9 |
| 33  | THIO2_ECOLI   | Thioredoxin 2 (EC 1.8.1.8) (Protein-disulfide reductase) (Disulfide reductase) (Trx2)                                                                                                               | 139         | 0             | 1 | 1 |
| 34  | TPX_ECOLI     | Thiol peroxidase (EC 1.11.1.-) (Scavengase P20)                                                                                                                                                     | 167         | 1             | 3 | 3 |
| 35  | PTGA_ECOLI    | Glucose-specific phosphotransferase enzyme IIA component (EC 2.7.1.-) (PTS system glucose-specific EIIA component) (EIIA-Glc) (EIII-Glc)                                                            | 168         | 0             | 1 | 3 |
| 36  | FABA_ECOLI    | 3-hydroxydecanoyl-[acyl-carrier-protein] dehydratase (EC 4.2.1.60) (Beta-hydroxydecanoyl thioester dehydrase)                                                                                       | 171         | 1             | 2 | 4 |
| 37  | IPYR_ECOLI    | Inorganic pyrophosphatase (EC 3.6.1.1) (Pyrophosphate phospho- hydrolase) (PPase)                                                                                                                   | 175         | 0             | 1 | 2 |
| 38  | AHPC_ECOLI    | Alkyl hydroperoxide reductase subunit C (EC 1.11.1.15) (Peroxiredoxin) (Thioredoxin peroxidase) (Alkyl hydroperoxide reductase protein C22) (SCRP-23) (Sulfate starvation-induced protein 8) (SSI8) | 186         | 0             | 1 | 1 |
| 39  | RRF_ECOLI     | Ribosome recycling factor (Ribosome releasing factor) (RRF)                                                                                                                                         | 185         | 0             | 0 | 1 |
| 40  | GRPE_ECOLI    | GrpE protein (HSP-70 cofactor) (Heat shock protein B25.3) (HSP24)                                                                                                                                   | 197         | 0             | 0 | 2 |
| 41  | DEOD_ECOLI    | Purine nucleoside phosphorylase (EC 2.4.2.1) (Inosine phosphorylase) (PNP)                                                                                                                          | 238         | 0             | 0 | 1 |
| 42  | THIG_ECOLI    | Thiazole biosynthesis protein thiG                                                                                                                                                                  | 256         | 2             | 3 | 7 |

TABLE 4: (continued)

| No. | Swiss-Prot ID | Protein                                                                                                                                                       | Seq. length | GroES repeats |   |    |
|-----|---------------|---------------------------------------------------------------------------------------------------------------------------------------------------------------|-------------|---------------|---|----|
|     |               |                                                                                                                                                               |             | 6             | 5 | 4  |
| 43  | DEOC_ECOLI    | Deoxyribose-phosphate aldolase (EC 4.1.2.4)<br>(Phosphodeoxyriboaldolase) (Deoxyriboaldolase) (DERA)                                                          | 259         | 0             | 0 | 5  |
| 44  | PANB_ECOLI    | 3-methyl-2-oxobutanoate hydroxymethyltransferase (EC 2.1.2.11) (Ketopantoate hydroxymethyltransferase)                                                        | 264         | 2             | 4 | 9  |
| 45  | GPMA_ECOLI    | 2,3-bisphosphoglycerate-dependent phosphoglycerate mutase (EC 5.4.2.1) (Phosphoglyceromutase) (PGAM) (BPG-dependent PGAM) (dPGM)                              | 249         | 0             | 0 | 1  |
| 46  | EFTS_ECOLI    | Elongation factor Ts (EF-Ts)                                                                                                                                  | 282         | 1             | 2 | 5  |
| 47  | RBSB_ECOLI    | D-ribose-binding periplasmic protein precursor (EC 3.6.3.17)                                                                                                  | 296         | 2             | 6 | 10 |
| 48  | BLAT_ECOLI    | Beta-lactamase TEM precursor (EC 3.5.2.6) (TEM-1) (TEM-2) (TEM-3) (TEM-4) (TEM-5) (TEM-6) (TEM-8/CAZ-2) (TEM-16/CAZ-7) (TEM-24/CAZ-6) (IRT-4) (Penicillinase) | 286         | 0             | 2 | 5  |
| 49  | G3P1_ECOLI    | Glyceraldehyde-3-phosphate dehydrogenase A (EC 1.2.1.12) (GAPDH-A)                                                                                            | 330         | 0             | 2 | 6  |
| 50  | RPOA_ECOLI    | DNA-directed RNA polymerase alpha chain (EC 2.7.7.6) (RNAP alpha subunit) (Transcriptase alpha chain) (RNA polymerase alpha subunit)                          | 329         | 0             | 0 | 3  |
| 51  | OMPA_ECOLI    | Outer membrane protein A precursor (Outer membrane protein II*)                                                                                               | 346         | 1             | 3 | 7  |
| 52  | YNCE_ECOLI    | Hypothetical protein yncE precursor                                                                                                                           | 353         | 3             | 7 | 14 |

TABLE 4: (continued)

| No. | Swiss-Prot ID | Protein                                                                                           | Seq. length | GroES repeats |   |    |
|-----|---------------|---------------------------------------------------------------------------------------------------|-------------|---------------|---|----|
|     |               |                                                                                                   |             | 6             | 5 | 4  |
| 53  | OMPC_ECOLI    | Outer membrane protein C precursor (Porin ompC) (Outer membrane protein 1B)                       | 367         | 1             | 5 | 6  |
| 54  | PGK_ECOLI     | Phosphoglycerate kinase (EC 2.7.2.3)                                                              | 386         | 0             | 2 | 8  |
| 55  | FABB_ECOLI    | 3-oxoacyl-[acyl-carrier-protein] synthase I (EC 2.3.1.41) (Beta- ketoacyl-ACP synthase I) (KAS I) | 406         | 1             | 7 | 12 |
| 56  | ACKA_ECOLI    | Acetate kinase (EC 2.7.2.1) (Acetokinase)                                                         | 400         | 2             | 4 | 10 |
| 57  | SERA_ECOLI    | D-3-phosphoglycerate dehydrogenase (EC 1.1.1.95) (PGDH)                                           | 409         | 1             | 3 | 7  |
| 58  | GLYA_ECOLI    | Serine hydroxymethyltransferase (EC 2.1.2.1) (Serine methylase) (SHMT)                            | 417         | 0             | 3 | 8  |
| 59  | ENO_ECOLI     | Enolase (EC 4.2.1.11) (2-phosphoglycerate dehydratase) (2-phospho-D- glycerate hydro-lyase)       | 431         | 2             | 4 | 7  |
| 60  | PURA_ECOLI    | Adenylosuccinate synthetase (EC 6.3.4.4) (IMP-aspartate ligase) (AdSS) (AMPSase)                  | 431         | 2             | 4 | 11 |
| 61  | TIG_ECOLI     | Trigger factor (TF)                                                                               | 432         | 1             | 1 | 2  |
| 62  | KPYK1_ECOLI   | Pyruvate kinase I (EC 2.7.1.40) (PK-1)                                                            | 470         | 2             | 7 | 15 |
| 63  | 6PGD_ECOLI    | 6-phosphogluconate dehydrogenase, decarboxylating (EC 1.1.1.44)                                   | 468         | 0             | 3 | 10 |
| 64  | SYN_ECOLI     | Asparaginyl-tRNA synthetase (EC 6.1.1.22) (Asparagine-tRNA ligase) (AsnRS)                        | 465         | 3             | 5 | 8  |
| 65  | OPPA_ECOLI    | Periplasmic oligopeptide-binding protein precursor                                                | 543         | 0             | 2 | 7  |

TABLE 4: (continued)

| No. | Swiss-Prot ID | Protein                                                                                                                                                                                       | Seq. length | GroES repeats |   |    |
|-----|---------------|-----------------------------------------------------------------------------------------------------------------------------------------------------------------------------------------------|-------------|---------------|---|----|
|     |               |                                                                                                                                                                                               |             | 6             | 5 | 4  |
| 66  | ODP2_ECOLI    | Dihydrolipoyllysine-residue acetyltransferase component of pyruvate dehydrogenase complex (EC 2.3.1.12) (E2) (Dihydrolipoamide acetyltransferase component of pyruvate dehydrogenase complex) | 629         | 0             | 2 | 14 |
| 67  | CIRA_ECOLI    | Colicin I receptor precursor                                                                                                                                                                  | 663         | 0             | 1 | 6  |
| 68  | PNP_ECOLI     | Polyribonucleotide nucleotidyltransferase (EC 2.7.7.8) (Polynucleotide phosphorylase) (PNPase)                                                                                                | 711         | 1             | 6 | 15 |
| 69  | EFG_ECOLI     | Elongation factor G (EF-G)                                                                                                                                                                    | 703         | 2             | 3 | 10 |
| 70  | ODP1_ECOLI    | Pyruvate dehydrogenase E1 component (EC 1.2.4.1)                                                                                                                                              | 886         | 3             | 7 | 15 |
| 71  | LPP_ECOLI     | Major outer membrane lipoprotein precursor (Murein-lipoprotein)                                                                                                                               | 78          | 1             | 1 | 3  |
| 72  | IF3_ECOLI     | Translation initiation factor IF-3                                                                                                                                                            | 180         | 0             | 0 | 3  |
| 73  | GNTY_ECOLI    | Protein gntY                                                                                                                                                                                  | 191         | 0             | 0 | 1  |
| 74  | DLDH_ECOLI    | Dihydrolipoyl dehydrogenase (EC 1.8.1.4) (E3 component of pyruvate and 2-oxoglutarate dehydrogenases complexes) (Dihydrolipoamide dehydrogenase) (Glycine cleavage system L protein)          | 473         | 1             | 5 | 13 |
| 75  | PPIC_ECOLI    | Peptidyl-prolyl cis-trans isomerase C (EC 5.2.1.8) (PPIase C) (Rotamase C) (Parvulin)                                                                                                         | 92          | 0             | 0 | 1  |
| 76  | YOHL_ECOLI    | Hypothetical protein yohL                                                                                                                                                                     | 90          | 1             | 1 | 3  |
| 77  | YDHD_ECOLI    | Probable monothiol glutaredoxin ydhD                                                                                                                                                          | 115         | 1             | 2 | 3  |
| 78  | NIKR_ECOLI    | Nickel responsive regulator                                                                                                                                                                   | 133         | 1             | 1 | 1  |
| 79  | YJBQ_ECOLI    | Hypothetical UPF0047 protein yjbQ                                                                                                                                                             | 138         | 0             | 0 | 2  |

TABLE 4: (continued)

| No. | Swiss-Prot ID | Protein                                                                                                                 | Seq. length | GroES repeats |   |   |
|-----|---------------|-------------------------------------------------------------------------------------------------------------------------|-------------|---------------|---|---|
|     |               |                                                                                                                         |             | 6             | 5 | 4 |
| 80  | USPG_ECOLI    | Universal stress protein G                                                                                              | 142         | 0             | 0 | 2 |
| 81  | MOAC_ECOLI    | Molybdenum cofactor biosynthesis protein C                                                                              | 160         | 0             | 0 | 4 |
| 82  | YFHP_ECOLI    | Hypothetical UPF0074 protein yfhP                                                                                       | 162         | 0             | 0 | 4 |
| 83  | GREA_ECOLI    | Transcription elongation factor greA (Transcript cleavage factor greA)                                                  | 158         | 0             | 0 | 2 |
| 84  | PPIB_ECOLI    | Peptidyl-prolyl cis-trans isomerase B (EC 5.2.1.8) (PPIase B) (Rotamase B)                                              | 164         | 1             | 3 | 4 |
| 85  | MOAB_ECOLI    | Molybdenum cofactor biosynthesis protein B                                                                              | 169         | 0             | 3 | 7 |
| 86  | DPS_ECOLI     | DNA protection during starvation protein                                                                                | 166         | 0             | 1 | 3 |
| 87  | NUOE_ECOLI    | NADH-quinone oxidoreductase chain E (EC 1.6.99.5) (NADH dehydrogenase I, chain E) (NDH-1, chain E) (NUO5)               | 166         | 0             | 1 | 2 |
| 88  | MUG_ECOLI     | G/U mismatch-specific DNA glycosylase (EC 3.2.2.-) (Mismatch-specific uracil DNA-glycosylase) (UDG)                     | 168         | 0             | 3 | 3 |
| 89  | LUXS_ECOLI    | S-ribosylhomocysteine lyase (EC 4.4.1.21) (Autoinducer-2 production protein luxS) (AI-2 synthesis protein)              | 170         | 0             | 0 | 1 |
| 90  | AROK_ECOLI    | Shikimate kinase I (EC 2.7.1.71) (SKI)                                                                                  | 172         | 0             | 2 | 3 |
| 91  | YFBU_ECOLI    | UPF0304 protein yfbU                                                                                                    | 164         | 1             | 1 | 1 |
| 92  | SEQA_ECOLI    | SeqA protein                                                                                                            | 181         | 0             | 1 | 4 |
| 93  | NUSG_ECOLI    | Transcription antitermination protein nusG                                                                              | 180         | 1             | 2 | 2 |
| 94  | RIMM_ECOLI    | 16S rRNA processing protein rimM (21K)                                                                                  | 182         | 0             | 0 | 4 |
| 95  | RIML_ECOLI    | Ribosomal-protein-serine acetyltransferase (EC 2.3.1.-) (Acetylating enzyme for N-terminal of ribosomal protein L7/L12) | 179         | 1             | 2 | 3 |

TABLE 4: (continued)

| No. | Swiss-Prot ID | Protein                                                                                                             | Seq. length | GroES repeats |   |   |
|-----|---------------|---------------------------------------------------------------------------------------------------------------------|-------------|---------------|---|---|
|     |               |                                                                                                                     |             | 6             | 5 | 4 |
| 96  | NUDH_ECOLI    | (Di)nucleoside polyphosphate hydrolase (EC 3.6.1.-) (Ap5A pyrophosphatase)                                          | 176         | 1             | 1 | 3 |
| 97  | PTH_ECOLI     | Peptidyl-tRNA hydrolase (EC 3.1.1.29) (PTH)                                                                         | 194         | 0             | 0 | 3 |
| 98  | HEMG_ECOLI    | Protoporphyrinogen oxidase (EC 1.3.3.4) (PPO)                                                                       | 181         | 0             | 1 | 2 |
| 99  | TEHB_ECOLI    | Tellurite resistance protein tehB                                                                                   | 197         | 1             | 1 | 4 |
| 100 | YIHX_ECOLI    | Phosphatase yihX (EC 3.1.3.-)                                                                                       | 199         | 0             | 1 | 7 |
| 101 | THIE_ECOLI    | Thiamine-phosphate pyrophosphorylase (EC 2.5.1.3) (TMP pyrophosphorylase) (TMP-PPase) (Thiamine-phosphate synthase) | 211         | 2             | 4 | 4 |
| 102 | YCIO_ECOLI    | Protein yciO                                                                                                        | 206         | 0             | 3 | 5 |
| 103 | ENGB_ECOLI    | Probable GTP-binding protein engB                                                                                   | 210         | 0             | 0 | 3 |
| 104 | RCSB_ECOLI    | Capsular synthesis regulator component B                                                                            | 216         | 1             | 3 | 7 |
| 105 | YCBL_ECOLI    | Hypothetical protein ycbL                                                                                           | 215         | 1             | 2 | 4 |
| 106 | UVRY_ECOLI    | Response regulator uvrY                                                                                             | 218         | 1             | 3 | 5 |
| 107 | GLRX2_ECOLI   | Glutaredoxin 2 (Grx2)                                                                                               | 215         | 0             | 0 | 2 |
| 108 | YODA_ECOLI    | Metal-binding protein yodA precursor (Cadmium-induced protein yodA)                                                 | 216         | 0             | 0 | 1 |
| 109 | CAN_ECOLI     | Carbonic anhydrase 2 (EC 4.2.1.1)                                                                                   | 220         | 0             | 2 | 7 |
| 110 | YGEA_ECOLI    | Hypothetical protein ygeA                                                                                           | 230         | 2             | 3 | 6 |
| 111 | INAA_ECOLI    | Protein inaA                                                                                                        | 216         | 1             | 1 | 3 |
| 112 | TRMH_ECOLI    | tRNA (Guanosine-2'-O-)-methyltransferase (EC 2.1.1.34) (tRNA [GM18] methyltransferase)                              | 229         | 1             | 2 | 6 |
| 113 | ARAD_ECOLI    | L-ribulose-5-phosphate 4-epimerase (EC 5.1.3.4) (Phosphoribulose isomerase)                                         | 231         | 0             | 3 | 6 |
| 114 | PHOP_ECOLI    | Transcriptional regulatory protein phoP                                                                             | 223         | 0             | 0 | 3 |



TABLE 4: (continued)

| No. | Swiss-Prot ID | Protein                                                                                                                                                                                                                | Seq. length | GroES repeats |   |   |
|-----|---------------|------------------------------------------------------------------------------------------------------------------------------------------------------------------------------------------------------------------------|-------------|---------------|---|---|
|     |               |                                                                                                                                                                                                                        |             | 6             | 5 | 4 |
| 115 | FABG_ECOLI    | 3-oxoacyl-[acyl-carrier-protein] reductase (EC 1.1.1.100) (3-ketoacyl-acyl carrier protein reductase)                                                                                                                  | 244         | 2             | 2 | 6 |
| 116 | PROQ_ECOLI    | ProP effector                                                                                                                                                                                                          | 232         | 0             | 0 | 0 |
| 117 | CPXR_ECOLI    | Transcriptional regulatory protein cpxR                                                                                                                                                                                | 232         | 0             | 1 | 5 |
| 118 | PYRF_ECOLI    | Orotidine 5'-phosphate decarboxylase (EC 4.1.1.23) (OMP decarboxylase) (OMPDCase) (OMPdecase)                                                                                                                          | 245         | 1             | 1 | 4 |
| 119 | OMPR_ECOLI    | Transcriptional regulatory protein ompR                                                                                                                                                                                | 239         | 0             | 0 | 4 |
| 120 | LPXA_ECOLI    | Acyl-[acyl-carrier-protein]-UDP-N-acetylglucosamine O-acyltransferase (EC 2.3.1.129) (UDP-N-acetylglucosamine acyltransferase)                                                                                         | 262         | 2             | 6 | 8 |
| 121 | YBFF_ECOLI    | Esterase ybfF (EC 3.1.-.-)                                                                                                                                                                                             | 254         | 1             | 2 | 5 |
| 122 | PSTB_ECOLI    | Phosphate import ATP-binding protein pstB (EC 3.6.3.27) (Phosphate-transporting ATPase) (ABC phosphate transporter)                                                                                                    | 256         | 2             | 4 | 7 |
| 123 | YJJV_ECOLI    | Putative deoxyribonuclease yjjV (EC 3.1.21.-)                                                                                                                                                                          | 259         | 0             | 1 | 3 |
| 124 | CYSE_ECOLI    | Serine acetyltransferase (EC 2.3.1.30) (SAT)                                                                                                                                                                           | 273         | 0             | 3 | 7 |
| 125 | KDSA_ECOLI    | 2-dehydro-3-deoxyphosphooctonate aldolase (EC 2.5.1.55) (Phospho-2-dehydro-3-deoxyoctonate aldolase) (3-deoxy-D-manno-octulosonic acid 8-phosphate synthetase) (KDO-8-phosphate synthetase) (KDO 8-P synthase) (KDOPS) | 284         | 0             | 2 | 4 |
| 126 | YFFS_ECOLI    | Hypothetical protein yffS                                                                                                                                                                                              | 279         | 0             | 2 | 3 |

TABLE 4: (continued)

| No. | Swiss-Prot ID | Protein                                                                                                                                  | Seq. length | GroES repeats |   |    |
|-----|---------------|------------------------------------------------------------------------------------------------------------------------------------------|-------------|---------------|---|----|
|     |               |                                                                                                                                          |             | 6             | 5 | 4  |
| 127 | YPT2_ECOLI    | Hypothetical 31.7 kDa protein in traX-finO intergenic region (ORFC)                                                                      | 286         | 2             | 2 | 6  |
| 128 | YBBN_ECOLI    | Protein ybbN                                                                                                                             | 284         | 1             | 2 | 11 |
| 129 | YIJO_ECOLI    | Putative HTH-type transcriptional regulator yijO                                                                                         | 283         | 1             | 4 | 7  |
| 130 | YNIA_ECOLI    | Hypothetical protein yniA                                                                                                                | 286         | 4             | 6 | 9  |
| 131 | HSLO_ECOLI    | 33 kDa chaperonin (Heat shock protein 33) (HSP33)                                                                                        | 292         | 1             | 4 | 8  |
| 132 | RLUB_ECOLI    | Ribosomal large subunit pseudouridine synthase B (EC 5.4.99.-) (rRNA- uridine isomerase B) (rRNA pseudouridylate synthase B)             | 291         | 0             | 2 | 4  |
| 133 | ROB_ECOLI     | Right origin-binding protein                                                                                                             | 289         | 1             | 3 | 8  |
| 134 | YCJZ_ECOLI    | Putative HTH-type transcriptional regulator ycjZ                                                                                         | 299         | 0             | 3 | 4  |
| 135 | YADB_ECOLI    | Hypothetical protein yadB                                                                                                                | 298         | 1             | 2 | 6  |
| 136 | YDHF_ECOLI    | Hypothetical oxidoreductase ydhF (EC 1.-.-.-)                                                                                            | 298         | 2             | 2 | 4  |
| 137 | KPRS_ECOLI    | Ribose-phosphate pyrophosphokinase (EC 2.7.6.1) (RPPK) (Phosphoribosyl pyrophosphate synthetase) (P-Rib-PP synthetase) (PRPP synthetase) | 314         | 1             | 2 | 6  |
| 138 | OXYR_ECOLI    | Hydrogen peroxide-inducible genes activator (Morphology and auto- aggregation control protein)                                           | 305         | 2             | 4 | 9  |
| 139 | YEAT_ECOLI    | Putative HTH-type transcriptional regulator yeaT                                                                                         | 307         | 2             | 3 | 10 |
| 140 | YBIB_ECOLI    | Hypothetical protein ybiB                                                                                                                | 320         | 0             | 2 | 6  |

TABLE 4: (continued)

| No. | Swiss-Prot ID | Protein                                                                                                                                     | Seq. length | GroES repeats |   |    |
|-----|---------------|---------------------------------------------------------------------------------------------------------------------------------------------|-------------|---------------|---|----|
|     |               |                                                                                                                                             |             | 6             | 5 | 4  |
| 141 | ACCA_ECOLI    | Acetyl-coenzyme A carboxylase carboxyl transferase subunit alpha (EC 6.4.1.2)                                                               | 318         | 0             | 4 | 4  |
| 142 | CYSB_ECOLI    | HTH-type transcriptional regulator cysB (Cys regulon transcriptional activator)                                                             | 324         | 0             | 2 | 3  |
| 143 | DUSA_ECOLI    | tRNA-dihydrouridine synthase A (EC 1.-.-.-)                                                                                                 | 330         | 0             | 3 | 8  |
| 144 | MREB_ECOLI    | Rod shape-determining protein mreB                                                                                                          | 347         | 2             | 8 | 13 |
| 145 | MOAA_ECOLI    | Molybdenum cofactor biosynthesis protein A                                                                                                  | 329         | 0             | 0 | 6  |
| 146 | GATD_ECOLI    | Galactitol-1-phosphate 5-dehydrogenase (EC 1.1.1.251)                                                                                       | 346         | 1             | 5 | 8  |
| 147 | RSMC_ECOLI    | Ribosomal RNA small subunit methyltransferase C (EC 2.1.1.52) (rRNA (guanine-N(2)-)-methyltransferase) (16S rRNA m2G1207 methyltransferase) | 342         | 2             | 8 | 8  |
| 148 | INH5_ECOLI    | Transposase insH for insertion sequence element IS5Y                                                                                        | 326         | 1             | 1 | 2  |
| 149 | YIHE_ECOLI    | Hypothetical protein yihE                                                                                                                   | 328         | 0             | 1 | 6  |
| 150 | TAS_ECOLI     | Tas protein                                                                                                                                 | 346         | 1             | 2 | 4  |
| 151 | PYRC_ECOLI    | Dihydroorotase (EC 3.5.2.3) (DHOase)                                                                                                        | 347         | 2             | 4 | 5  |
| 152 | YGHZ_ECOLI    | Hypothetical protein yghZ                                                                                                                   | 346         | 1             | 2 | 4  |
| 153 | ALF_ECOLI     | Fructose-bisphosphate aldolase class II (EC 4.1.2.13) (FBP aldolase)                                                                        | 358         | 3             | 3 | 6  |
| 154 | DCUP_ECOLI    | Uroporphyrinogen decarboxylase (EC 4.1.1.37) (URO-D) (UPD)                                                                                  | 354         | 2             | 3 | 5  |
| 155 | INSH_ECOLI    | Transposase insH for insertion sequence element IS5                                                                                         | 338         | 2             | 2 | 3  |

TABLE 4: (continued)

| No. | Swiss-Prot ID | Protein                                                                                                                                                                                                       | Seq. length | GroES repeats |   |    |
|-----|---------------|---------------------------------------------------------------------------------------------------------------------------------------------------------------------------------------------------------------|-------------|---------------|---|----|
|     |               |                                                                                                                                                                                                               |             | 6             | 5 | 4  |
| 156 | OMPF_ECOLI    | Outer membrane protein F precursor (Porin ompF) (Outer membrane protein 1A) (Outer membrane protein IA) (Outer membrane protein B)                                                                            | 362         | 1             | 3 | 6  |
| 157 | SERC_ECOLI    | Phosphoserine aminotransferase (EC 2.6.1.52) (PSAT)                                                                                                                                                           | 361         | 1             | 2 | 9  |
| 158 | YBBB_ECOLI    | Hypothetical protein ybbB                                                                                                                                                                                     | 364         | 1             | 2 | 8  |
| 159 | ENTC_ECOLI    | Isochorismate synthase entC (EC 5.4.4.2) (Isochorismate mutase)                                                                                                                                               | 391         | 2             | 3 | 13 |
| 160 | ARGM_ECOLI    | Succinylornithine transaminase (EC 2.6.1.-) (Succinylornithine aminotransferase) (Carbon starvation protein C)                                                                                                | 406         | 1             | 2 | 10 |
| 161 | ODO2_ECOLI    | Dihydrolipoyllysine-residue succinyltransferase component of 2-oxoglutarate dehydrogenase complex (EC 2.3.1.61) (E2) (Dihydrolipoamide succinyltransferase component of 2-oxoglutarate dehydrogenase complex) | 404         | 0             | 2 | 7  |
| 162 | ISCS_ECOLI    | Cysteine desulfurase (EC 2.8.1.7) (ThiI transper-sulfidase) (NifS protein homolog)                                                                                                                            | 404         | 1             | 2 | 5  |
| 163 | GLPB_ECOLI    | Anaerobic glycerol-3-phosphate dehydrogenase subunit B (EC 1.1.99.5) (Anaerobic G-3-P dehydrogenase subunit B) (Anaerobic G3Pdase B)                                                                          | 419         | 4             | 6 | 9  |
| 164 | GSA_ECOLI     | Glutamate-1-semialdehyde 2,1-aminomutase (EC 5.4.3.8) (GSA) (Glutamate-1-semialdehyde aminotransferase) (GSA-AT)                                                                                              | 426         | 2             | 3 | 10 |
| 165 | YADE_ECOLI    | Hypothetical protein yadE precursor                                                                                                                                                                           | 409         | 2             | 4 | 10 |

TABLE 4: (continued)

| No. | Swiss-Prot ID | Protein                                                                                                      | Seq. length | GroES repeats |   |    |
|-----|---------------|--------------------------------------------------------------------------------------------------------------|-------------|---------------|---|----|
|     |               |                                                                                                              |             | 6             | 5 | 4  |
| 166 | AVTA_ECOLI    | Valine-pyruvate aminotransferase (EC 2.6.1.66)<br>(Transaminase C) (Alanine-valine transaminase)             | 417         | 0             | 5 | 13 |
| 167 | RHLB_ECOLI    | ATP-dependent RNA helicase rhlB (EC 3.6.1.-)                                                                 | 420         | 2             | 4 | 9  |
| 168 | RHO_ECOLI     | Transcription termination factor rho                                                                         | 419         | 1             | 5 | 9  |
| 169 | DHNA_ECOLI    | NADH dehydrogenase (EC 1.6.99.3)                                                                             | 433         | 6             | 8 | 10 |
| 170 | CISY_ECOLI    | Citrate synthase (EC 2.3.3.1)                                                                                | 427         | 0             | 1 | 8  |
| 171 | YGAF_ECOLI    | Hypothetical protein ygaF                                                                                    | 444         | 1             | 7 | 12 |
| 172 | PAAK_ECOLI    | Phenylacetate-coenzyme A ligase (EC 6.2.1.30)<br>(Phenylacetyl-CoA ligase) (PA-CoA ligase)                   | 437         | 0             | 3 | 5  |
| 173 | NUOF_ECOLI    | NADH-quinone oxidoreductase chain F (EC 1.6.99.5) (NADH dehydrogenase I, chain F)<br>(NDH-1, chain F) (NUO6) | 445         | 2             | 3 | 7  |
| 174 | ACCC_ECOLI    | Biotin carboxylase (EC 6.3.4.14) (A subunit of acetyl-CoA carboxylase) (EC 6.4.1.2) (ACC)                    | 449         | 2             | 4 | 12 |
| 175 | YEGD_ECOLI    | Hypothetical chaperone protein yegD                                                                          | 450         | 1             | 4 | 9  |
| 176 | YCAJ_ECOLI    | Hypothetical protein ycaJ                                                                                    | 447         | 1             | 5 | 15 |
| 177 | STHA_ECOLI    | Soluble pyridine nucleotide transhydrogenase (EC 1.6.1.1) (STH) (NAD(P)(+) transhydrogenase [B-specific])    | 465         | 1             | 3 | 6  |
| 178 | DCEA_ECOLI    | Glutamate decarboxylase alpha (EC 4.1.1.15)<br>(GAD-alpha)                                                   | 466         | 1             | 3 | 14 |
| 179 | TNAA_ECOLI    | Tryptophanase (EC 4.1.99.1) (L-tryptophan indole-lyase) (TNase)                                              | 471         | 1             | 4 | 12 |
| 180 | YDCR_ECOLI    | Hypothetical protein ydcR                                                                                    | 468         | 3             | 5 | 12 |
| 181 | PCNB_ECOLI    | Poly(A) polymerase (EC 2.7.7.19) (PAP) (Plasmid copy number protein)                                         | 472         | 0             | 0 | 4  |

TABLE 4: (continued)

| No. | Swiss-Prot ID | Protein                                                                                                                                                                                                | Seq. length | GroES repeats |    |    |
|-----|---------------|--------------------------------------------------------------------------------------------------------------------------------------------------------------------------------------------------------|-------------|---------------|----|----|
|     |               |                                                                                                                                                                                                        |             | 6             | 5  | 4  |
| 182 | MGLA_ECOLI    | Galactoside transport ATP-binding protein<br>mglA                                                                                                                                                      | 506         | 2             | 6  | 13 |
| 183 | TYP_A_ECOLI   | GTP-binding protein typA/BipA (Tyrosine phosphorylated protein A)                                                                                                                                      | 607         | 3             | 7  | 13 |
| 184 | NUOCD_ECOLI   | NADH-quinone oxidoreductase chain C/D (EC 1.6.99.5) (NADH dehydrogenase I, chain C/D) (NDH-1, chain C/D) (NUO3/NUO4)                                                                                   | 600         | 1             | 4  | 10 |
| 185 | DNAK_ECOLI    | Chaperone protein dnaK (Heat shock protein 70) (Heat shock 70 kDa protein) (HSP70)                                                                                                                     | 637         | 0             | 2  | 8  |
| 186 | GIDA_ECOLI    | Glucose inhibited division protein A                                                                                                                                                                   | 629         | 3             | 4  | 13 |
| 187 | YDCP_ECOLI    | Putative protease ydcP precursor (EC 3.4.-.-)                                                                                                                                                          | 653         | 1             | 2  | 7  |
| 188 | SYT_ECOLI     | Threonyl-tRNA synthetase (EC 6.1.1.3) (Threonine-tRNA ligase) (ThrRS)                                                                                                                                  | 642         | 1             | 5  | 11 |
| 189 | SPOT_ECOLI    | Guanosine-3',5'-bis(diphosphate) 3'-pyrophosphohydrolase (EC 3.1.7.2) ((ppGpp)ase) (Penta-phosphate guanosine-3'-pyrophosphohydrolase)                                                                 | 702         | 1             | 2  | 7  |
| 190 | LON_ECOLI     | ATP-dependent protease La (EC 3.4.21.53)                                                                                                                                                               | 784         | 1             | 2  | 8  |
| 191 | RNR_ECOLI     | Ribonuclease R (EC 3.1.-.-) (RNase R) (VacB protein)                                                                                                                                                   | 813         | 2             | 3  | 7  |
| 192 | ADHE_ECOLI    | Aldehyde-alcohol dehydrogenase [Includes: Alcohol dehydrogenase (EC 1.1.1.1) (ADH); Acetaldehyde dehydrogenase [acetylating] (EC 1.2.1.10) (ACDH); Pyruvate-formate-lyase deactivase (PFL deactivase)] | 890         | 5             | 13 | 22 |
| 193 | GYRA_ECOLI    | DNA gyrase subunit A (EC 5.99.1.3)                                                                                                                                                                     | 875         | 1             | 7  | 17 |

TABLE 4: (continued)

| No. | Swiss-Prot ID | Protein                                                                                                                                                                         | Seq. length | GroES repeats |    |    |
|-----|---------------|---------------------------------------------------------------------------------------------------------------------------------------------------------------------------------|-------------|---------------|----|----|
|     |               |                                                                                                                                                                                 |             | 6             | 5  | 4  |
| 194 | IF2_ECOLI     | Translation initiation factor IF-2                                                                                                                                              | 890         | 5             | 8  | 11 |
| 195 | GLND_ECOLI    | [Protein-PII] uridylyltransferase (EC 2.7.7.59)<br>(PII uridylyl- transferase) (Uridylyl removing enzyme) (UTase)                                                               | 890         | 1             | 3  | 19 |
| 196 | ODO1_ECOLI    | 2-oxoglutarate dehydrogenase E1 component (EC 1.2.4.2) (Alpha- ketoglutarate dehydrogenase)                                                                                     | 933         | 0             | 7  | 16 |
| 197 | PUR4_ECOLI    | Phosphoribosylformylglycinamide synthase (EC 6.3.5.3) (FGAM synthase) (FGAMS)<br>(Formylglycinamide ribotide amidotransferase) (FGARAT) (Formylglycinamide ribotide synthetase) | 1295        | 4             | 13 | 28 |
| 198 | HRPA_ECOLI    | ATP-dependent helicase hrpA                                                                                                                                                     | 1300        | 3             | 5  | 15 |
| 199 | RPOB_ECOLI    | DNA-directed RNA polymerase beta chain (EC 2.7.7.6) (RNAP beta subunit) (Transcriptase beta chain) (RNA polymerase beta subunit)                                                | 1342        | 1             | 7  | 17 |
| 200 | RPOC_ECOLI    | DNA-directed RNA polymerase beta' chain (EC 2.7.7.6) (RNAP beta' subunit) (Transcriptase beta' chain) (RNA polymerase beta' subunit)                                            | 1407        | 5             | 15 | 27 |
| 201 | YBAK_ECOLI    | Protein ybaK                                                                                                                                                                    | 159         | 1             | 3  | 3  |
| 202 | HHPA_ECOLI    | Histone-like protein HLP-1 precursor (DNA-binding 17 kDa protein)                                                                                                               | 161         | 0             | 2  | 2  |
| 203 | SSRP_ECOLI    | SsrA-binding protein (Small protein B)                                                                                                                                          | 159         | 1             | 3  | 6  |
| 204 | RSD_ECOLI     | Regulator of sigma D                                                                                                                                                            | 158         | 0             | 0  | 1  |
| 205 | UBIC_ECOLI    | Chorismate-pyruvate lyase (EC 4.-.-.-)                                                                                                                                          | 164         | 0             | 1  | 4  |
| 206 | YQAB_ECOLI    | Phosphatase yqaB (EC 3.1.3.-)                                                                                                                                                   | 188         | 1             | 2  | 4  |

TABLE 4: (continued)

| No. | Swiss-Prot ID | Protein                                                                                                                             | Seq. length | GroES repeats |   |   |
|-----|---------------|-------------------------------------------------------------------------------------------------------------------------------------|-------------|---------------|---|---|
|     |               |                                                                                                                                     |             | 6             | 5 | 4 |
| 207 | YCFP_ECOLI    | Hypothetical UPF0227 protein ycfP                                                                                                   | 180         | 0             | 0 | 1 |
| 208 | RFBC_ECOLI    | dTDP-4-dehydrorhamnose 3,5-epimerase (EC 5.1.3.13) (dTDP-4-keto-6-deoxyglucose 3,5-epimerase) (dTDP-L-rhamnose synthetase)          | 185         | 1             | 2 | 4 |
| 209 | RIMJ_ECOLI    | Ribosomal-protein-alanine acetyltransferase (EC 2.3.1.128) (Acetylating enzyme for N-terminal of ribosomal protein S5)              | 194         | 1             | 1 | 4 |
| 210 | YAJB_ECOLI    | Hypothetical protein yajB                                                                                                           | 193         | 0             | 0 | 5 |
| 211 | YQJI_ECOLI    | Hypothetical protein yqjI                                                                                                           | 207         | 0             | 1 | 1 |
| 212 | CRP_ECOLI     | Catabolite gene activator (cAMP receptor protein) (cAMP-regulatory protein)                                                         | 210         | 0             | 1 | 5 |
| 213 | FTSE_ECOLI    | Cell division ATP-binding protein ftsE                                                                                              | 222         | 1             | 4 | 7 |
| 214 | GCH1_ECOLI    | GTP cyclohydrolase I (EC 3.5.4.16) (GTP-CH-I)                                                                                       | 221         | 1             | 1 | 4 |
| 215 | TRMB_ECOLI    | tRNA (guanine-N(7)-)-methyltransferase (EC 2.1.1.33) (tRNA(m7G46)- methyltransferase)                                               | 239         | 0             | 0 | 2 |
| 216 | FUCR_ECOLI    | L-fucose operon activator                                                                                                           | 243         | 1             | 1 | 5 |
| 217 | PFLA_ECOLI    | Pyruvate formate-lyase 1 activating enzyme (EC 1.97.1.4) (PFL- activating enzyme) (Formate-C-acetyltransferase-activating enzyme 1) | 245         | 0             | 1 | 5 |
| 218 | TRMD_ECOLI    | tRNA (Guanine-N(1)-)-methyltransferase (EC 2.1.1.31) (M1G- methyltransferase) (tRNA [GM37] methyltransferase)                       | 255         | 1             | 3 | 4 |
| 219 | GLCC_ECOLI    | Glc operon transcriptional activator                                                                                                | 254         | 1             | 2 | 4 |
| 220 | SUHB_ECOLI    | Inositol-1-monophosphatase (EC 3.1.3.25) (IM-Pase) (Inositol-1-phosphatase) (I-1-Pase)                                              | 267         | 1             | 3 | 8 |
| 221 | YCFH_ECOLI    | Putative deoxyribonuclease ycfH (EC 3.1.21.-)                                                                                       | 265         | 0             | 0 | 4 |



TABLE 4: (continued)

| No. | Swiss-Prot ID | Protein                                                                                                                                                                            | Seq. length | GroES repeats |   |    |
|-----|---------------|------------------------------------------------------------------------------------------------------------------------------------------------------------------------------------|-------------|---------------|---|----|
|     |               |                                                                                                                                                                                    |             | 6             | 5 | 4  |
| 222 | YAFD_ECOLI    | Hypothetical UPF0294 protein yafD                                                                                                                                                  | 266         | 1             | 4 | 8  |
| 223 | GATY_ECOLI    | Tagatose-1,6-bisphosphate aldolase gatY (EC 4.1.2.-) (TBPA)                                                                                                                        | 284         | 2             | 3 | 7  |
| 224 | DAPA_ECOLI    | Dihydrodipicolinate synthase (EC 4.2.1.52) (DHDPS)                                                                                                                                 | 292         | 1             | 2 | 4  |
| 225 | AMIA_ECOLI    | Probable N-acetylmuramoyl-L-alanine amidase amiA precursor (EC 3.5.1.28)                                                                                                           | 289         | 2             | 3 | 9  |
| 226 | END4_ECOLI    | Endonuclease IV (EC 3.1.21.2) (Endodeoxyribonuclease IV)                                                                                                                           | 285         | 0             | 1 | 4  |
| 227 | YPT1_ECOLI    | Hypothetical 31.7 kDa protein in traX-finO intergenic region                                                                                                                       | 286         | 2             | 2 | 6  |
| 228 | YNEB_ECOLI    | Putative aldolase yneB (EC 4.2.1.-)                                                                                                                                                | 291         | 1             | 4 | 8  |
| 229 | NANA_ECOLI    | N-acetylneuraminate lyase (EC 4.1.3.3) (N-acetylneuraminic acid aldolase) (N-acetylneuraminate pyruvate-lyase) (Sialic acid lyase) (Sialate lyase) (Sialic acid aldolase) (NALase) | 296         | 1             | 2 | 7  |
| 230 | YHBJ_ECOLI    | Hypothetical UPF0042 protein yhbJ                                                                                                                                                  | 284         | 1             | 3 | 6  |
| 231 | METF_ECOLI    | 5,10-methylenetetrahydrofolate reductase (EC 1.7.99.5)                                                                                                                             | 296         | 1             | 2 | 6  |
| 232 | ARAC_ECOLI    | Arabinose operon regulatory protein                                                                                                                                                | 292         | 3             | 5 | 7  |
| 233 | ICIA_ECOLI    | Chromosome initiation inhibitor (OriC replication inhibitor)                                                                                                                       | 297         | 3             | 5 | 10 |
| 234 | DUSC_ECOLI    | tRNA-dihydrouridine synthase C (EC 1.-.-.)                                                                                                                                         | 315         | 2             | 4 | 5  |

TABLE 4: (continued)

| No. | Swiss-Prot ID | Protein                                                                                                                                                 | Seq. length | GroES repeats |   |    |
|-----|---------------|---------------------------------------------------------------------------------------------------------------------------------------------------------|-------------|---------------|---|----|
|     |               |                                                                                                                                                         |             | 6             | 5 | 4  |
| 235 | HEM2_ECOLI    | Delta-aminolevulinic acid dehydratase (EC 4.2.1.24) (Porphobilinogen synthase) (ALAD) (ALADH)                                                           | 323         | 1             | 2 | 6  |
| 236 | DUSB_ECOLI    | tRNA-dihydrouridine synthase B (EC 1.-.-)                                                                                                               | 321         | 1             | 2 | 3  |
| 237 | RLUC_ECOLI    | Ribosomal large subunit pseudouridine synthase C (EC 5.4.99.-) (rRNA- uridine isomerase C) (rRNA pseudouridylate synthase C)                            | 319         | 0             | 0 | 6  |
| 238 | LIPA_ECOLI    | Lipoyl synthase (EC 2.8.1.-) (Lipoic acid synthase) (Lipoate synthase) (Lipoyl-acyl-carrier protein synthase) (Sulfur insertion protein lipA) (Lip-syn) | 321         | 1             | 1 | 3  |
| 239 | ADD_ECOLI     | Adenosine deaminase (EC 3.5.4.4) (Adenosine aminohydrolase)                                                                                             | 333         | 2             | 3 | 3  |
| 240 | YAJO_ECOLI    | Hypothetical oxidoreductase yajO (EC 1.-.-)                                                                                                             | 324         | 0             | 0 | 4  |
| 241 | LTAE_ECOLI    | Low-specificity L-threonine aldolase (EC 4.1.2.5) (Low-specificity L- TA)                                                                               | 333         | 3             | 5 | 12 |
| 242 | NAGZ_ECOLI    | Beta-hexosaminidase (EC 3.2.1.52) (N-acetyl-beta-glucosaminidase) (Beta-N-acetylhexosaminidase)                                                         | 341         | 3             | 4 | 9  |
| 243 | YFIF_ECOLI    | Hypothetical tRNA/rRNA methyltransferase yfiF (EC 2.1.1.-)                                                                                              | 345         | 0             | 1 | 6  |
| 244 | ALF1_ECOLI    | Fructose-bisphosphate aldolase class I (EC 4.1.2.13) (FBP aldolase)                                                                                     | 349         | 1             | 3 | 7  |
| 245 | YBJS_ECOLI    | Hypothetical protein ybjS                                                                                                                               | 337         | 0             | 2 | 6  |
| 246 | ALR2_ECOLI    | Alanine racemase, catabolic (EC 5.1.1.1)                                                                                                                | 356         | 1             | 3 | 6  |
| 247 | YJJU_ECOLI    | Hypothetical protein yjjU                                                                                                                               | 357         | 2             | 6 | 8  |

TABLE 4: (continued)

| No. | Swiss-Prot ID | Protein                                                                                                                                                                                  | Seq. length | GroES repeats |   |    |
|-----|---------------|------------------------------------------------------------------------------------------------------------------------------------------------------------------------------------------|-------------|---------------|---|----|
|     |               |                                                                                                                                                                                          |             | 6             | 5 | 4  |
| 248 | DHAS_ECOLI    | Aspartate-semialdehyde dehydrogenase (EC 1.2.1.11) (ASA dehydrogenase) (ASADH)                                                                                                           | 367         | 1             | 1 | 6  |
| 249 | HIS7_ECOLI    | Histidine biosynthesis bifunctional protein hisB [Includes: Histidinol-phosphatase (EC 3.1.3.15); Imidazoleglycerol-phosphate dehydratase (EC 4.2.1.19) (IGPD)]                          | 355         | 0             | 0 | 5  |
| 250 | PHOL_ECOLI    | PhoH-like protein                                                                                                                                                                        | 359         | 1             | 2 | 5  |
| 251 | THIK_ECOLI    | Thiamine kinase (EC 2.7.1.89)                                                                                                                                                            | 274         | 0             | 4 | 8  |
| 252 | DNAJ_ECOLI    | Chaperone protein dnaJ (Heat shock protein J) (HSP40)                                                                                                                                    | 375         | 1             | 2 | 6  |
| 253 | BIOF_ECOLI    | 8-amino-7-oxononanoate synthase (EC 2.3.1.47) (AONS) (8-amino-7- ketopelargonate synthase) (7-keto-8-amino-pelargonic acid synthetase) (7-KAP synthetase) (L-alanine-pimelyl CoA ligase) | 384         | 1             | 4 | 12 |
| 254 | METK_ECOLI    | S-adenosylmethionine synthetase (EC 2.5.1.6) (Methionine adenosyltransferase) (AdoMet synthetase) (MAT)                                                                                  | 383         | 3             | 5 | 12 |
| 255 | TRMA_ECOLI    | tRNA (Uracil-5-)-methyltransferase (EC 2.1.1.35) (tRNA(M-5-U54)- methyltransferase) (RUMT)                                                                                               | 366         | 0             | 3 | 7  |
| 256 | RSMD_ECOLI    | Putative ribosomal RNA small subunit methyltransferase D (EC 2.1.1.52) (rRNA (guanine-N(2)-)-methyltransferase) (16S rRNA m2G966 methyltransferase)                                      | 378         | 4             | 5 | 10 |

TABLE 4: (continued)

| No. | Swiss-Prot ID | Protein                                                                                                                             | Seq. length | GroES repeats |   |    |
|-----|---------------|-------------------------------------------------------------------------------------------------------------------------------------|-------------|---------------|---|----|
|     |               |                                                                                                                                     |             | 6             | 5 | 4  |
| 257 | ARGE_ECOLI    | Acetylornithine deacetylase (EC 3.5.1.16)<br>(Acetylornithinase) (AO) (N- acetylornithinase)<br>(NAO)                               | 383         | 0             | 4 | 8  |
| 258 | LLDD_ECOLI    | L-lactate dehydrogenase (Cytochrome) (EC 1.1.2.3)                                                                                   | 396         | 2             | 2 | 11 |
| 259 | FABF_ECOLI    | 3-oxoacyl-[acyl-carrier-protein] synthase II (EC 2.3.1.41) (Beta- ketoacyl-ACP synthase II) (KAS II)                                | 412         | 1             | 2 | 7  |
| 260 | PHEA_ECOLI    | P-protein [Includes: Chorismate mutase (EC 5.4.99.5) (CM); Prephenate dehydratase (EC 4.2.1.51) (PDT)]                              | 386         | 3             | 5 | 9  |
| 261 | THIH_ECOLI    | Thiazole biosynthesis protein thiH                                                                                                  | 376         | 1             | 2 | 8  |
| 262 | INTS_ECOLI    | Putative prophage CPS-53 integrase                                                                                                  | 385         | 0             | 2 | 4  |
| 263 | SUFS_ECOLI    | Cysteine desulfurase (EC 2.8.1.7) (Selenocysteine lyase) (EC 4.4.1.16) (Selenocysteine reductase) (Selenocysteine beta-lyase) (SCL) | 406         | 2             | 5 | 10 |
| 264 | YFBQ_ECOLI    | Probable aminotransferase yfbQ (EC 2.6.1.-)                                                                                         | 405         | 1             | 3 | 7  |
| 265 | RSPA_ECOLI    | Starvation sensing protein rspA                                                                                                     | 404         | 0             | 1 | 3  |
| 266 | GATZ_ECOLI    | Putative tagatose 6-phosphate kinase gatZ (EC 2.7.1.144)                                                                            | 420         | 0             | 0 | 8  |
| 267 | TYPH_ECOLI    | Thymidine phosphorylase (EC 2.4.2.4)<br>(TdRPase)                                                                                   | 440         | 1             | 5 | 14 |
| 268 | DADA_ECOLI    | D-amino acid dehydrogenase small subunit (EC 1.4.99.1)                                                                              | 432         | 2             | 3 | 4  |
| 269 | PMBA_ECOLI    | PmbA protein (TldE protein)                                                                                                         | 450         | 0             | 3 | 7  |

TABLE 4: (continued)

| No. | Swiss-Prot ID | Protein                                                                                                          | Seq. length | GroES repeats |   |    |
|-----|---------------|------------------------------------------------------------------------------------------------------------------|-------------|---------------|---|----|
|     |               |                                                                                                                  |             | 6             | 5 | 4  |
| 270 | EUTB_ECOLI    | Ethanolamine ammonia-lyase heavy chain (EC 4.3.1.7) (Ethanolamine ammonia-lyase large subunit)                   | 453         | 1             | 4 | 12 |
| 271 | XYLA_ECOLI    | Xylose isomerase (EC 5.3.1.5) (D-xylulose keto-isomerase)                                                        | 440         | 0             | 4 | 10 |
| 272 | RHLE_ECOLI    | Putative ATP-dependent RNA helicase rhIE                                                                         | 454         | 1             | 5 | 8  |
| 273 | PEPQ_ECOLI    | Xaa-Pro dipeptidase (EC 3.4.13.9) (X-Pro dipeptidase) (Proline dipeptidase) (Prolidase) (Imidodipeptidase)       | 443         | 1             | 4 | 11 |
| 274 | TLDD_ECOLI    | TldD protein                                                                                                     | 481         | 2             | 6 | 13 |
| 275 | UXAC_ECOLI    | Uronate isomerase (EC 5.3.1.12) (Glucuronate isomerase) (Uronic isomerase)                                       | 470         | 0             | 1 | 5  |
| 276 | AMPA_ECOLI    | Cytosol aminopeptidase (EC 3.4.11.1) (Leucine aminopeptidase) (LAP) (Leucyl aminopeptidase) (Aminopeptidase A/I) | 503         | 4             | 9 | 13 |
| 277 | ARAA_ECOLI    | L-arabinose isomerase (EC 5.3.1.4)                                                                               | 500         | 4             | 4 | 10 |
| 278 | ALDB_ECOLI    | Aldehyde dehydrogenase B (EC 1.2.1.-)                                                                            | 512         | 2             | 6 | 15 |
| 279 | DHSA_ECOLI    | Succinate dehydrogenase flavoprotein subunit (EC 1.3.99.1)                                                       | 588         | 3             | 5 | 12 |
| 280 | FRDA_ECOLI    | Fumarate reductase flavoprotein subunit (EC 1.3.99.1)                                                            | 601         | 1             | 4 | 15 |
| 281 | DEAD_ECOLI    | Cold-shock DEAD-box protein A (ATP-dependent RNA helicase deaD)                                                  | 628         | 1             | 5 | 10 |
| 282 | YCBY_ECOLI    | Hypothetical UPF0020/UPF0064 protein ycbY                                                                        | 702         | 4             | 7 | 13 |
| 283 | PARC_ECOLI    | Topoisomerase IV subunit A (EC 5.99.1.-)                                                                         | 752         | 3             | 8 | 20 |
| 284 | PHSM_ECOLI    | Maltodextrin phosphorylase (EC 2.4.1.1)                                                                          | 796         | 6             | 8 | 19 |

GroES patterns are G\_IVL\_G\_A ( $N_C = 6$  contacts), G\_IVL\_G ( $N_C = 5$  contacts), and G\_IVL ( $N_C = 4$  contacts). Any separation along the sequence between identified patterns is considered. The requirement of a sequence spacer of 10 residues between binding motifs results in slightly fewer motifs per protein.

## I. REFERENCES

1. Kerner, M. J., Naylor, D. J., Ishihama, Y., Maier, T., Chang, H., Stines, A. P., Georgopoulos, C., Frishman, D., Hayer-Hartl, M., Mann, M. & Hartl, F. U. (2005). Proteome-wide Analysis of Chaperonin-Dependent Protein Folding in *Escherichia coli*. *Cell*, **122**, 209–220.
