# Supplementary material
Source: PubMed Central journal article supplement (PMC1450189)
Supplement: pnas_0600433103_2.pdf [file pnas_0600433103_2.pdf]

**Table 5. The solvent-accessible area,  $r_s$ , of putative binding motifs for GroEL interactors in *E. coli* with known three-dimensional structure (1).**

| Swiss-Prot ID | Protein                                                                                                                                  | Start | End | $r_s$  |
|---------------|------------------------------------------------------------------------------------------------------------------------------------------|-------|-----|--------|
| TPX_ECOLI     | Thiol peroxidase (EC 1.11.1.-) (Scavengase P20)                                                                                          | 58    | 64  | 0.6207 |
|               |                                                                                                                                          | 78    | 84  | 0.0126 |
|               |                                                                                                                                          | 119   | 127 | 0.2670 |
| PTGA_ECOLI    | Glucose-specific phosphotransferase enzyme IIA component (EC 2.7.1.-) (PTS system glucose-specific EIIA component) (EIIA-Glc) (EIII-Glc) | 37    | 41  | 0.2030 |
|               |                                                                                                                                          | 57    | 61  | 0.0906 |
|               |                                                                                                                                          | 136   | 142 | 0.0234 |
| FABA_ECOLI    | 3-hydroxydecanoyl-[acyl-carrier-protein] ) dehydratase (EC 4.2.1.60)<br>(Beta-hydroxydecanoyl thioester dehydrase                        | 31    | 35  | 0.3200 |
|               |                                                                                                                                          | 62    | 68  | 0.4143 |
|               |                                                                                                                                          | 145   | 153 | 0.2864 |
| IPYR_ECOLI    | Inorganic pyrophosphatase (EC 3.6.1.1)<br>(Pyrophosphate phospho- hydrolase) (PPase)                                                     | 36    | 40  | 0.3934 |
|               |                                                                                                                                          | 46    | 52  | 0.3507 |
| RRF_ECOLI     | Ribosome recycling factor (Ribosome releasing factor) (RRF)                                                                              | 164   | 168 | 0.2254 |
| GRPE_ECOLI    | GrpE protein (HSP-70 cofactor)<br>(Heat shock protein B25.3) (HSP24)                                                                     | 84    | 88  | 0.5178 |
|               |                                                                                                                                          | 154   | 158 | 0.3636 |
| DEOD_ECOLI    | Purine nucleoside phosphorylase (EC 2.4.2.1)<br>(Inosine phosphorylase) (PNP)                                                            | 123   | 127 | 0.4972 |
| DEOC_ECOLI    | Deoxyribose-phosphate aldolase (EC 4.1.2.4)<br>(Phosphodeoxyriboaldolase)<br>(Deoxyriboaldolase) (DERA)                                  | 42    | 46  | 0.0634 |
|               |                                                                                                                                          | 90    | 94  | 0.2492 |
|               |                                                                                                                                          | 171   | 175 | 0.5128 |
|               |                                                                                                                                          | 213   | 217 | 0.2650 |
|               |                                                                                                                                          | 238   | 242 | 0.3418 |
| PANB_ECOLI    | 3-methyl-2-oxobutanoate<br>hydroxymethyltransferase (EC 2.1.2.11)<br>(Ketopantoate hydroxymethyltransferase)                             | 39    | 43  | 0.0834 |
|               |                                                                                                                                          | 68    | 72  | 0.0902 |
|               |                                                                                                                                          | 77    | 81  | 0.2520 |
|               |                                                                                                                                          | 86    | 92  | 0.2771 |
|               |                                                                                                                                          | 116   | 122 | 0.2934 |

TABLE 5: (continued)

| Swiss-Prot ID | Protein                                                             | Start | End | $r_s$  |
|---------------|---------------------------------------------------------------------|-------|-----|--------|
|               |                                                                     | 165   | 169 | 0.2114 |
|               |                                                                     | 176   | 180 | 0.0816 |
|               |                                                                     | 192   | 200 | 0.2231 |
|               |                                                                     | 210   | 218 | 0.0500 |
| EFTS_ECOLI    | Elongation factor Ts (EF-Ts)                                        | 53    | 61  | 0.2218 |
|               |                                                                     | 79    | 83  | 0.3506 |
|               |                                                                     | 152   | 156 | 0.0000 |
|               |                                                                     | 231   | 237 | 0.3609 |
|               |                                                                     | 269   | 273 | 0.6220 |
| BLAT_ECOLI    | Beta-lactamase TEM precursor (EC 3.5.2.6)                           | 228   | 232 | 0.2102 |
|               | (TEM-1) (TEM-2) (TEM-3) (TEM-4)                                     | 245   | 251 | 0.0016 |
|               | (TEM-5) (TEM-6) (TEM-8/CAZ-2) (TEM-16/CAZ-7) (TEM-24/CAZ-6) (IRT-4) | 258   | 262 | 0.0994 |
|               | (Penicillinase)                                                     |       |     |        |
| OMPA_ECOLI    | Outer membrane protein A precursor                                  | 98    | 102 | 0.3110 |
|               | (Outer membrane protein II*)                                        | 120   | 126 | 0.1730 |
| RBSB_ECOLI    | D-ribose-binding periplasmic protein precursor                      | 3     | 11  | 0.0707 |
|               | (EC 3.6.3.17)                                                       | 13    | 17  | 0.3356 |
|               |                                                                     | 33    | 39  | 0.2311 |
|               |                                                                     | 58    | 64  | 0.0890 |
|               |                                                                     | 113   | 117 | 0.0834 |
|               |                                                                     | 146   | 154 | 0.3617 |
|               |                                                                     | 184   | 190 | 0.0730 |
|               |                                                                     | 207   | 213 | 0.2364 |
|               |                                                                     | 227   | 231 | 0.2888 |
| SERA_ECOLI    | D-3-phosphoglycerate dehydrogenase                                  | 80    | 86  | 0.1830 |
|               | (EC 1.1.1.95) (PGDH)                                                | 118   | 122 | 0.2486 |

TABLE 5: (continued)

| Swiss-Prot ID | Protein                                                                             | Start | End | $r_s$  |
|---------------|-------------------------------------------------------------------------------------|-------|-----|--------|
|               |                                                                                     | 140   | 146 | 0.6296 |
|               |                                                                                     | 174   | 178 | 0.2258 |
|               |                                                                                     | 232   | 236 | 0.1098 |
|               |                                                                                     | 355   | 363 | 0.3893 |
|               |                                                                                     | 377   | 381 | 0.0002 |
| GLYA_ECOLI    | Serine hydroxymethyltransferase (EC 2.1.2.1)<br>(Serine methylase) (SHMT)           | 102   | 106 | 0.0532 |
|               |                                                                                     | 167   | 171 | 0.0378 |
|               |                                                                                     | 194   | 198 | 0.2290 |
|               |                                                                                     | 206   | 210 | 0.0554 |
|               |                                                                                     | 236   | 240 | 0.0000 |
|               |                                                                                     | 253   | 257 | 0.1892 |
|               |                                                                                     | 271   | 275 | 0.0514 |
|               |                                                                                     | 316   | 320 | 0.0050 |
| PURA_ECOLI    | Adenylosuccinate synthetase (EC 6.3.4.4)<br>(IMP-aspartate ligase) (AdSS) (AMPSase) | 3     | 11  | 0.0052 |
|               |                                                                                     | 41    | 47  | 0.3369 |
|               |                                                                                     | 70    | 78  | 0.1237 |
|               |                                                                                     | 190   | 194 | 0.2200 |
|               |                                                                                     | 198   | 202 | 0.2720 |
|               |                                                                                     | 215   | 219 | 0.1554 |
|               |                                                                                     | 287   | 293 | 0.2727 |
|               |                                                                                     | 325   | 329 | 0.0606 |
|               |                                                                                     | 358   | 362 | 0.2150 |
|               |                                                                                     | 392   | 396 | 0.2392 |
| ODP1_ECOLI    | Pyruvate dehydrogenase E1 component<br>(EC 1.2.4.1)                                 | 134   | 140 | 0.0254 |
|               |                                                                                     | 145   | 149 | 0.0106 |
|               |                                                                                     | 223   | 229 | 0.0503 |
|               |                                                                                     | 252   | 258 | 0.0236 |

TABLE 5: (continued)

| Swiss-Prot ID | Protein                                                                               | Start | End | $r_s$  |
|---------------|---------------------------------------------------------------------------------------|-------|-----|--------|
|               |                                                                                       | 344   | 348 | 0.1880 |
|               |                                                                                       | 355   | 359 | 0.2808 |
|               |                                                                                       | 384   | 390 | 0.0040 |
|               |                                                                                       | 494   | 498 | 0.0712 |
|               |                                                                                       | 577   | 585 | 0.0124 |
|               |                                                                                       | 594   | 602 | 0.0423 |
|               |                                                                                       | 608   | 612 | 0.2712 |
|               |                                                                                       | 660   | 664 | 0.0068 |
|               |                                                                                       | 684   | 690 | 0.0434 |
|               |                                                                                       | 846   | 850 | 0.0642 |
| PPIC_ECOLI    | Peptidyl-prolyl cis-trans isomerase C (EC 5.2.1.8) (PPIase C) (Rotamase C) (Parvulin) | 3     | 7   | 0.1298 |
| YDHD_ECOLI    | Probable monothiol glutaredoxin ydhD                                                  | 15    | 19  | 0.0918 |
|               |                                                                                       | 38    | 44  | 0.2640 |
|               |                                                                                       | 72    | 80  | 0.1649 |
| MOAC_ECOLI    | Molybdenum cofactor biosynthesis protein C                                            | 40    | 44  | 0.1534 |
|               |                                                                                       | 52    | 56  | 0.2728 |
|               |                                                                                       | 77    | 81  | 0.4258 |
|               |                                                                                       | 120   | 124 | 0.2174 |
| GRE_A_ECOLI   | Transcription elongation factor greA<br>(Transcript cleavage factor greA)             | 27    | 31  | 0.3862 |
|               |                                                                                       | 84    | 88  | 0.2024 |
| PPIB_ECOLI    | Peptidyl-prolyl cis-trans isomerase B<br>(EC 5.2.1.8) (PPIase B) (Rotamase B)         | 9     | 15  | 0.2296 |
|               |                                                                                       | 46    | 52  | 0.2030 |
|               |                                                                                       | 82    | 90  | 0.2172 |
|               |                                                                                       | 119   | 123 | 0.0908 |
| MOAB_ECOLI    | Molybdenum cofactor biosynthesis protein B                                            | 10    | 16  | 0.0550 |
|               |                                                                                       | 52    | 56  | 0.3266 |

TABLE 5: (continued)

| Swiss-Prot ID | Protein                                                                                                   | Start | End | $r_s$  |
|---------------|-----------------------------------------------------------------------------------------------------------|-------|-----|--------|
|               |                                                                                                           | 61    | 65  | 0.3600 |
|               |                                                                                                           | 70    | 76  | 0.0284 |
|               |                                                                                                           | 87    | 91  | 0.1538 |
|               |                                                                                                           | 120   | 124 | 0.1180 |
|               |                                                                                                           | 130   | 134 | 0.0158 |
| DPS_ECOLI     | DNA protection during starvation protein                                                                  | 58    | 62  | 0.3854 |
|               |                                                                                                           | 88    | 94  | 0.3410 |
| MUG_ECOLI     | G/U mismatch-specific DNA glycosylase<br>(EC 3.2.2.-) (Mismatch-specific uracil<br>DNA-glycosylase) (UDG) | 102   | 108 | 0.0781 |
|               |                                                                                                           | 133   | 139 | 0.0491 |
|               |                                                                                                           | 161   | 165 | 0.5968 |
| AROK_ECOLI    | Shikimate kinase I (EC 2.7.1.71) (SKI)                                                                    | 6     | 12  | 0.0234 |
|               |                                                                                                           | 74    | 80  | 0.1503 |
|               |                                                                                                           | 98    | 102 | 0.0416 |
| YFBU_ECOLI    | UPF0304 protein yfbU                                                                                      | 13    | 21  | 0.3533 |
| SEQA_ECOLI    | SeqA protein                                                                                              | 89    | 93  | 0.1716 |
|               |                                                                                                           | 117   | 121 | 0.2940 |
|               |                                                                                                           | 143   | 149 | 0.1521 |
| YCIO_ECOLI    | Protein yciO                                                                                              | 2     | 8   | 0.3276 |
|               |                                                                                                           | 27    | 33  | 0.0539 |
|               |                                                                                                           | 36    | 40  | 0.0036 |
|               |                                                                                                           | 191   | 195 | 0.4418 |
| ENGB_ECOLI    | Probable GTP-binding protein engB                                                                         | 110   | 114 | 0.0786 |
|               |                                                                                                           | 136   | 140 | 0.2906 |
| GLRX2_ECOLI   | Glutaredoxin 2 (Grx2)                                                                                     | 98    | 102 | 0.1830 |
|               |                                                                                                           | 211   | 215 | 0.4864 |
| ARAD_ECOLI    | L-ribulose-5-phosphate 4-epimerase (EC 5.1.3.4)<br>(Phosphoribulose isomerase)                            | 37    | 43  | 0.0657 |
|               |                                                                                                           | 80    | 84  | 0.0562 |

TABLE 5: (continued)

| Swiss-Prot ID | Protein                                                                                                                                                                                                                                    | Start | End | $r_s$  |
|---------------|--------------------------------------------------------------------------------------------------------------------------------------------------------------------------------------------------------------------------------------------|-------|-----|--------|
|               |                                                                                                                                                                                                                                            | 146   | 152 | 0.0963 |
|               |                                                                                                                                                                                                                                            | 164   | 170 | 0.1211 |
|               |                                                                                                                                                                                                                                            | 172   | 176 | 0.0074 |
|               |                                                                                                                                                                                                                                            | 185   | 189 | 0.1718 |
| FABG_ECOLI    | 3-oxoacyl-[acyl-carrier-protein] reductase<br>(EC 1.1.1.100) (3-ketoacyl- acyl carrier<br>protein reductase)                                                                                                                               | 5     | 13  | 0.1594 |
|               |                                                                                                                                                                                                                                            | 18    | 26  | 0.1103 |
|               |                                                                                                                                                                                                                                            | 118   | 122 | 0.2178 |
|               |                                                                                                                                                                                                                                            | 150   | 154 | 0.1188 |
|               |                                                                                                                                                                                                                                            | 217   | 221 | 0.1844 |
|               |                                                                                                                                                                                                                                            | 239   | 243 | 0.3798 |
| LPXA_ECOLI    | Acyl-[acyl-carrier-protein]-UDP-N-<br>acetylglucosamine O-acyltransferase<br>(EC 2.3.1.129)<br>(UDP-N-acetylglucosamine acyltransferase)                                                                                                   | 10    | 14  | 0.4132 |
|               |                                                                                                                                                                                                                                            | 28    | 36  | 0.2393 |
|               |                                                                                                                                                                                                                                            | 46    | 52  | 0.1707 |
|               |                                                                                                                                                                                                                                            | 115   | 119 | 0.1860 |
|               |                                                                                                                                                                                                                                            | 131   | 139 | 0.2343 |
|               |                                                                                                                                                                                                                                            | 160   | 166 | 0.1986 |
|               |                                                                                                                                                                                                                                            | 182   | 188 | 0.0867 |
|               |                                                                                                                                                                                                                                            | 250   | 256 | 0.3220 |
| KDSA_ECOLI    | 2-dehydro-3-deoxyphosphooctonate aldolase<br>(EC 2.5.1.55) (Phospho-2- dehydro-3-<br>deoxyoctonate aldolase) (3-deoxy-D-manno-<br>octulosonic acid 8- phosphate synthetase) (KDO-<br>8-phosphate synthetase) (KDO 8-P synthase)<br>(KDOPS) | 18    | 24  | 0.0760 |
|               |                                                                                                                                                                                                                                            | 115   | 121 | 0.3137 |
|               |                                                                                                                                                                                                                                            | 131   | 135 | 0.1268 |
|               |                                                                                                                                                                                                                                            | 194   | 198 | 0.0000 |
| HSLO_ECOLI    | 33 kDa chaperonin (Heat shock protein 33)<br>(HSP33)                                                                                                                                                                                       | 10    | 18  | 0.6104 |
|               |                                                                                                                                                                                                                                            | 78    | 84  | 0.1304 |
|               |                                                                                                                                                                                                                                            | 112   | 118 | 0.2150 |

TABLE 5: (continued)

| Swiss-Prot ID | Protein                                      | Start | End | $r_s$  |
|---------------|----------------------------------------------|-------|-----|--------|
| ROB_ECOLI     | Right origin-binding protein                 | 154   | 160 | 0.3360 |
|               |                                              | 208   | 212 | 0.3302 |
|               |                                              | 62    | 66  | 0.0058 |
|               |                                              | 99    | 103 | 0.2094 |
|               |                                              | 175   | 179 | 0.1718 |
|               |                                              | 194   | 202 | 0.0698 |
|               |                                              | 215   | 221 | 0.3647 |
|               |                                              | 222   | 228 | 0.1259 |
| YADB_ECOLI    | Hypothetical protein yadB                    | 237   | 241 | 0.2014 |
|               |                                              | 22    | 30  | 0.0521 |
|               |                                              | 38    | 42  | 0.1258 |
|               |                                              | 73    | 79  | 0.3731 |
|               |                                              | 168   | 172 | 0.2608 |
|               |                                              | 173   | 177 | 0.0244 |
| YDHF_ECOLI    | Hypothetical oxidoreductase ydhF (EC 1.-.-.) | 245   | 249 | 0.1988 |
|               |                                              | 15    | 19  | 0.0210 |
|               |                                              | 164   | 172 | 0.2871 |
| TAS_ECOLI     | Tas protein                                  | 188   | 196 | 0.2738 |
|               |                                              | 70    | 76  | 0.3007 |
|               |                                              | 271   | 275 | 0.2682 |
|               |                                              | 290   | 294 | 0.0352 |
| PYRC_ECOLI    | Dihydroorotase (EC 3.5.2.3) (DHOase)         | 299   | 307 | 0.1401 |
|               |                                              | 37    | 45  | 0.0440 |
|               |                                              | 201   | 205 | 0.0740 |
|               |                                              | 208   | 214 | 0.4956 |
|               |                                              | 217   | 225 | 0.1123 |
|               |                                              | 243   | 249 | 0.0894 |

TABLE 5: (continued)

| Swiss-Prot ID | Protein                                                                                                                                                                                                                    | Start | End | $r_s$  |
|---------------|----------------------------------------------------------------------------------------------------------------------------------------------------------------------------------------------------------------------------|-------|-----|--------|
| ALF_ECOLI     | Fructose-bisphosphate aldolase class II<br>(EC 4.1.2.13) (FBP aldolase)                                                                                                                                                    | 27    | 31  | 0.1604 |
|               |                                                                                                                                                                                                                            | 79    | 87  | 0.1559 |
|               |                                                                                                                                                                                                                            | 306   | 314 | 0.4338 |
|               |                                                                                                                                                                                                                            | 330   | 334 | 0.4690 |
|               |                                                                                                                                                                                                                            | 339   | 343 | 0.2426 |
| OMPF_ECOLI    | Outer membrane protein F precursor (Porin<br>ompF) (Outer membrane protein 1A)<br>(Outer membrane protein IA)<br>(Outer membrane protein B)                                                                                | 81    | 87  | 0.2489 |
|               |                                                                                                                                                                                                                            | 224   | 230 | 0.2421 |
|               |                                                                                                                                                                                                                            | 255   | 259 | 0.2130 |
|               |                                                                                                                                                                                                                            | 271   | 275 | 0.2158 |
| SERC_ECOLI    | Phosphoserine aminotransferase (EC 2.6.1.52)<br>(PSAT)                                                                                                                                                                     | 10    | 14  | 0.2954 |
|               |                                                                                                                                                                                                                            | 78    | 84  | 0.0421 |
|               |                                                                                                                                                                                                                            | 100   | 104 | 0.1850 |
|               |                                                                                                                                                                                                                            | 142   | 146 | 0.1476 |
|               |                                                                                                                                                                                                                            | 190   | 194 | 0.0020 |
|               |                                                                                                                                                                                                                            | 206   | 210 | 0.0010 |
|               |                                                                                                                                                                                                                            | 243   | 251 | 0.0782 |
| ODO2_ECOLI    | Dihydrolipoyllysine-residue succinyltransferase<br>component of 2- oxoglutarate dehydrogenase<br>complex (EC 2.3.1.61) (E2) (Dihydrolipoamide<br>succinyltransferase component of 2-oxoglutarate<br>dehydrogenase complex) | 197   | 203 | 0.3311 |
|               |                                                                                                                                                                                                                            | 341   | 345 | 0.0218 |
|               |                                                                                                                                                                                                                            | 365   | 369 | 0.0766 |
|               |                                                                                                                                                                                                                            | 398   | 402 | 0.5100 |
| ISCS_ECOLI    | Cysteine desulfurase (EC 2.8.1.7)<br>(ThiI transpersulfidase)<br>(NifS protein homolog)                                                                                                                                    | 104   | 110 | 0.1759 |
|               |                                                                                                                                                                                                                            | 161   | 169 | 0.2030 |
|               |                                                                                                                                                                                                                            | 214   | 218 | 0.0094 |
|               |                                                                                                                                                                                                                            | 312   | 316 | 0.3420 |
|               |                                                                                                                                                                                                                            | 335   | 339 | 0.0650 |



TABLE 5: (continued)

| Swiss-Prot ID | Protein                              | Start      | End                                                                                       | $r_s$  |
|---------------|--------------------------------------|------------|-------------------------------------------------------------------------------------------|--------|
| RHO_ECOLI     | Transcription termination factor rho | 32         | 36                                                                                        | 0.1304 |
|               |                                      | 70         | 76                                                                                        | 0.2274 |
|               |                                      | 129        | 135                                                                                       | 0.4269 |
|               |                                      | 174        | 182                                                                                       | 0.1538 |
|               |                                      | 193        | 199                                                                                       | 0.2797 |
|               |                                      | 200        | 204                                                                                       | 0.3408 |
|               |                                      | 225        | 231                                                                                       | 0.1620 |
|               |                                      | 378        | 382                                                                                       | 0.3290 |
|               |                                      | 401        | 405                                                                                       | 0.4108 |
| CISY_ECOLI    | Citrate synthase (EC 2.3.3.1)        | 130        | 136                                                                                       | 0.1333 |
|               |                                      | 138        | 142                                                                                       | 0.1724 |
|               |                                      | 169        | 173                                                                                       | 0.0124 |
|               |                                      | 182        | 186                                                                                       | 0.3882 |
|               |                                      | 247        | 251                                                                                       | 0.1068 |
|               |                                      | 268        | 272                                                                                       | 0.3944 |
|               |                                      | 365        | 369                                                                                       | 0.0352 |
|               |                                      | 380        | 384                                                                                       | 0.0542 |
|               |                                      | ACCC_ECOLI | Biotin carboxylase (EC 6.3.4.14) (A subunit of acetyl-CoA carboxylase) (EC 6.4.1.2) (ACC) | 11     |
| 41            | 45                                   |            |                                                                                           | 0.2288 |
| 74            | 82                                   |            |                                                                                           | 0.1218 |
| 99            | 107                                  |            |                                                                                           | 0.2003 |
| 118           | 122                                  |            |                                                                                           | 0.2514 |
| 145           | 149                                  |            |                                                                                           | 0.1894 |
| 220           | 224                                  |            |                                                                                           | 0.2648 |
| 282           | 286                                  |            |                                                                                           | 0.2048 |
| 369           | 373                                  |            |                                                                                           | 0.1746 |
|               | 386                                  | 392        | 0.0343                                                                                    |        |

TABLE 5: (continued)

| Swiss-Prot ID | Protein                                                                               | Start | End | $r_s$  |
|---------------|---------------------------------------------------------------------------------------|-------|-----|--------|
| DCEA_ECOLI    | Glutamate decarboxylase alpha (EC 4.1.1.15)<br>(GAD-alpha)                            | 407   | 413 | 0.3461 |
|               |                                                                                       | 92    | 96  | 0.2044 |
|               |                                                                                       | 127   | 135 | 0.0779 |
|               |                                                                                       | 155   | 161 | 0.0094 |
|               |                                                                                       | 185   | 191 | 0.3183 |
|               |                                                                                       | 247   | 251 | 0.0000 |
|               |                                                                                       | 256   | 260 | 0.3656 |
|               |                                                                                       | 285   | 289 | 0.0016 |
|               |                                                                                       | 297   | 301 | 0.4138 |
|               |                                                                                       | 311   | 315 | 0.3012 |
|               |                                                                                       | 322   | 326 | 0.0444 |
|               |                                                                                       | 348   | 352 | 0.2384 |
|               |                                                                                       | 376   | 380 | 0.0000 |
|               |                                                                                       | 416   | 420 | 0.3830 |
| DNAK_ECOLI    | Chaperone protein dnaK (Heat shock protein 70)<br>(Heat shock 70 kDa protein) (HSP70) | 13    | 17  | 0.0772 |
|               |                                                                                       | 37    | 43  | 0.0777 |
|               |                                                                                       | 64    | 68  | 0.1054 |
|               |                                                                                       | 99    | 103 | 0.1648 |
|               |                                                                                       | 136   | 140 | 0.1390 |
|               |                                                                                       | 172   | 176 | 0.0310 |
|               |                                                                                       | 189   | 193 | 0.0148 |
| SYT_ECOLI     | Threonyl-tRNA synthetase (EC 6.1.1.3)<br>(Threonine-tRNA ligase) (ThrRS)              | 90    | 98  | 0.2036 |
|               |                                                                                       | 100   | 104 | 0.0872 |
|               |                                                                                       | 170   | 174 | 0.1076 |
|               |                                                                                       | 220   | 224 | 0.0902 |
|               |                                                                                       | 261   | 267 | 0.2753 |
|               |                                                                                       | 295   | 299 | 0.3336 |

TABLE 5: (continued)

| Swiss-Prot ID | Protein                                                                     | Start | End | $r_s$  |
|---------------|-----------------------------------------------------------------------------|-------|-----|--------|
|               |                                                                             | 511   | 517 | 0.0516 |
|               |                                                                             | 534   | 538 | 0.0122 |
|               |                                                                             | 541   | 545 | 0.0020 |
|               |                                                                             | 591   | 597 | 0.0299 |
|               |                                                                             | 604   | 610 | 0.2110 |
| LON_ECOLI     | ATP-dependent protease La (EC 3.4.21.53)                                    | 599   | 603 | 0.1176 |
|               |                                                                             | 681   | 685 | 0.0010 |
| GYRA_ECOLI    | DNA gyrase subunit A (EC 5.99.1.3)                                          | 116   | 120 | 0.4014 |
|               |                                                                             | 132   | 136 | 0.0996 |
|               |                                                                             | 164   | 170 | 0.0313 |
|               |                                                                             | 172   | 176 | 0.5412 |
|               |                                                                             | 192   | 196 | 0.0804 |
|               |                                                                             | 218   | 224 | 0.1036 |
|               |                                                                             | 238   | 242 | 0.2304 |
|               |                                                                             | 313   | 321 | 0.3496 |
|               |                                                                             | 333   | 339 | 0.1659 |
|               |                                                                             | 408   | 414 | 0.3897 |
|               |                                                                             | 418   | 422 | 0.4728 |
|               |                                                                             | 446   | 450 | 0.2276 |
| HLP_A_ECOLI   | Histone-like protein HLP-1 precursor (DNA-binding 17 kDa protein)           | 132   | 138 | 0.6241 |
| UBI_C_ECOLI   | Chorismate-pyruvate lyase (EC 4.-.-.-)                                      | 71    | 75  | 0.2770 |
|               |                                                                             | 102   | 106 | 0.2326 |
|               |                                                                             | 115   | 121 | 0.4140 |
|               |                                                                             | 154   | 158 | 0.0246 |
| CRP_ECOLI     | Catabolite gene activator (cAMP receptor protein) (cAMP-regulatory protein) | 338   | 342 | 0.0772 |
|               |                                                                             | 345   | 349 | 0.1044 |

TABLE 5: (continued)

| Swiss-Prot ID | Protein                                                                          | Start | End | $r_s$  |
|---------------|----------------------------------------------------------------------------------|-------|-----|--------|
|               |                                                                                  | 410   | 414 | 0.4234 |
|               |                                                                                  | 432   | 436 | 0.4722 |
|               |                                                                                  | 502   | 506 | 0.1158 |
| GCH1_ECOLI    | GTP cyclohydrolase I (EC 3.5.4.16) (GTP-CH-I)                                    | 11    | 15  | 0.2962 |
|               |                                                                                  | 122   | 126 | 0.0312 |
|               |                                                                                  | 157   | 165 | 0.0627 |
|               |                                                                                  | 169   | 173 | 0.1662 |
| TRMD_ECOLI    | tRNA (Guanine-N(1)-)-methyltransferase<br>(EC 2.1.1.31) (M1G- methyltransferase) | 59    | 67  | 0.1766 |
|               | (tRNA [GM37] methyltransferase)                                                  | 106   | 110 | 0.2532 |
|               |                                                                                  | 134   | 140 | 0.4661 |
|               |                                                                                  | 193   | 199 | 0.4384 |
| YCFH_ECOLI    | Putative deoxyribonuclease ycfH (EC 3.1.21.-)                                    | 88    | 92  | 0.0474 |
|               |                                                                                  | 138   | 142 | 0.1042 |
|               |                                                                                  | 206   | 210 | 0.2222 |
|               |                                                                                  | 220   | 224 | 0.0342 |
| DAPA_ECOLI    | Dihydrodipicolinate synthase (EC 4.2.1.52)<br>(DHDPS)                            | 5     | 13  | 0.0061 |
|               |                                                                                  | 36    | 40  | 0.0736 |
|               |                                                                                  | 129   | 133 | 0.0660 |
|               |                                                                                  | 241   | 247 | 0.3466 |
| END4_ECOLI    | Endonuclease IV (EC 3.1.21.2)<br>(Endodeoxyribonuclease IV)                      | 27    | 33  | 0.0731 |
|               |                                                                                  | 160   | 164 | 0.1242 |
|               |                                                                                  | 182   | 186 | 0.0424 |
|               |                                                                                  | 265   | 269 | 0.4302 |
| NANA_ECOLI    | N-acetylneuraminate lyase (EC 4.1.3.3)<br>(N-acetylneuraminic acid aldolase)     | 7     | 11  | 0.0304 |
|               | (N-acetylneuraminate pyruvate-lyase)                                             | 49    | 55  | 0.1923 |
|               | (Sialic acid lyase) (Sialate lyase)                                              | 89    | 93  | 0.2166 |
|               |                                                                                  | 107   | 111 | 0.3328 |

TABLE 5: (continued)

| Swiss-Prot ID | Protein                                                                                                                                      | Start | End | $r_s$  |
|---------------|----------------------------------------------------------------------------------------------------------------------------------------------|-------|-----|--------|
|               | (Sialic acid aldolase) (NALase)                                                                                                              | 133   | 137 | 0.0606 |
|               |                                                                                                                                              | 182   | 190 | 0.2211 |
|               |                                                                                                                                              | 196   | 200 | 0.3204 |
| METF_ECOLI    | 5,10-methylenetetrahydrofolate reductase<br>(EC 1.7.99.5)                                                                                    | 113   | 121 | 0.2293 |
|               |                                                                                                                                              | 148   | 152 | 0.0548 |
|               |                                                                                                                                              | 182   | 186 | 0.0600 |
|               |                                                                                                                                              | 232   | 236 | 0.3174 |
|               |                                                                                                                                              | 283   | 289 | 0.1807 |
| ARAC_ECOLI    | Arabinose operon regulatory protein                                                                                                          | 69    | 73  | 0.0176 |
|               |                                                                                                                                              | 94    | 102 | 0.2584 |
|               |                                                                                                                                              | 111   | 119 | 0.2913 |
|               |                                                                                                                                              | 148   | 156 | 0.2322 |
| HEM2_ECOLI    | Delta-aminolevulinic acid dehydratase<br>(EC 4.2.1.24) (Porphobilinogen synthase)<br>(ALAD) (ALADH)                                          | 28    | 32  | 0.1162 |
|               |                                                                                                                                              | 110   | 116 | 0.2497 |
|               |                                                                                                                                              | 149   | 153 | 0.0640 |
|               |                                                                                                                                              | 163   | 171 | 0.1356 |
|               |                                                                                                                                              | 273   | 277 | 0.1852 |
|               |                                                                                                                                              | 310   | 314 | 0.0342 |
| DHAS_ECOLI    | Aspartate-semialdehyde dehydrogenase<br>(EC 1.2.1.11) (ASA dehydrogenase) (ASADH)                                                            | 14    | 18  | 0.1064 |
|               |                                                                                                                                              | 91    | 95  | 0.1924 |
|               |                                                                                                                                              | 138   | 142 | 0.0062 |
|               |                                                                                                                                              | 145   | 149 | 0.1338 |
|               |                                                                                                                                              | 194   | 198 | 0.6584 |
|               |                                                                                                                                              | 317   | 325 | 0.3768 |
| BIOF_ECOLI    | 8-amino-7-oxononanoate synthase (EC 2.3.1.47)<br>(AONS) (8-amino-7- ketopelargonate synthase)<br>(7-keto-8-amino-pelargonic acid synthetase) | 31    | 35  | 0.1600 |
|               |                                                                                                                                              | 100   | 104 | 0.1908 |
|               |                                                                                                                                              | 107   | 115 | 0.1290 |

TABLE 5: (continued)

| Swiss-Prot ID | Protein                                                                                                | Start | End | $r_s$  |
|---------------|--------------------------------------------------------------------------------------------------------|-------|-----|--------|
|               | (7-KAP synthetase)                                                                                     | 169   | 173 | 0.1554 |
|               | (L-alanine-pimelyl CoA ligase)                                                                         | 198   | 202 | 0.2530 |
|               |                                                                                                        | 218   | 222 | 0.1780 |
|               |                                                                                                        | 227   | 233 | 0.0530 |
|               |                                                                                                        | 242   | 248 | 0.0646 |
|               |                                                                                                        | 279   | 285 | 0.1724 |
|               |                                                                                                        | 321   | 325 | 0.0448 |
|               |                                                                                                        | 341   | 345 | 0.1040 |
| METK_ECOLI    | S-adenosylmethionine synthetase (EC 2.5.1.6)                                                           | 23    | 27  | 0.0086 |
|               | (Methionine adenosyltransferase)                                                                       | 48    | 56  | 0.2108 |
|               | (AdoMet synthetase) (MAT)                                                                              | 58    | 62  | 0.4596 |
|               |                                                                                                        | 87    | 95  | 0.4248 |
|               |                                                                                                        | 119   | 123 | 0.2922 |
|               |                                                                                                        | 130   | 134 | 0.2940 |
|               |                                                                                                        | 199   | 203 | 0.2262 |
|               |                                                                                                        | 220   | 224 | 0.2752 |
|               |                                                                                                        | 228   | 236 | 0.2496 |
|               |                                                                                                        | 273   | 277 | 0.0098 |
|               |                                                                                                        | 284   | 288 | 0.0914 |
|               |                                                                                                        | 308   | 314 | 0.2860 |
| PHEA_ECOLI    | P-protein [Includes: Chorismate mutase (EC 5.4.99.5) (CM); Prephenate dehydratase (EC 4.2.1.51) (PDT)] | 88    | 96  | 0.3646 |
| SUFS_ECOLI    | Cysteine desulfurase (EC 2.8.1.7)                                                                      | 23    | 31  | 0.1402 |
|               | (Selenocysteine lyase) (EC 4.4.1.16)                                                                   | 49    | 55  | 0.3586 |
|               | (Selenocysteine reductase)                                                                             | 131   | 135 | 0.3808 |
|               | (Selenocysteine beta-lyase) (SCL)                                                                      | 165   | 173 | 0.0412 |

TABLE 5: (continued)

| Swiss-Prot ID | Protein                                                                                                                | Start | End | $r_s$  |
|---------------|------------------------------------------------------------------------------------------------------------------------|-------|-----|--------|
|               |                                                                                                                        | 234   | 238 | 0.0002 |
|               |                                                                                                                        | 253   | 257 | 0.3378 |
|               |                                                                                                                        | 333   | 337 | 0.0178 |
|               |                                                                                                                        | 362   | 366 | 0.2318 |
|               |                                                                                                                        | 367   | 373 | 0.3204 |
|               |                                                                                                                        | 381   | 387 | 0.0290 |
| TYPH.ECOLI    | Thymidine phosphorylase (EC 2.4.2.4)<br>(TdRPase)                                                                      | 37    | 41  | 0.2714 |
|               |                                                                                                                        | 94    | 102 | 0.0036 |
|               |                                                                                                                        | 150   | 156 | 0.0534 |
|               |                                                                                                                        | 207   | 213 | 0.2786 |
|               |                                                                                                                        | 217   | 221 | 0.1268 |
|               |                                                                                                                        | 235   | 239 | 0.0134 |
|               |                                                                                                                        | 243   | 249 | 0.0627 |
|               |                                                                                                                        | 276   | 280 | 0.0188 |
|               |                                                                                                                        | 314   | 320 | 0.1604 |
|               |                                                                                                                        | 335   | 339 | 0.4344 |
|               |                                                                                                                        | 340   | 344 | 0.3094 |
|               |                                                                                                                        | 360   | 364 | 0.0950 |
|               |                                                                                                                        | 398   | 402 | 0.0724 |
| AMPA.ECOLI    | Cytosol aminopeptidase (EC 3.4.11.1)<br>(Leucine aminopeptidase) (LAP)<br>(Leucyl aminopeptidase) (Aminopeptidase A/I) | 15    | 23  | 0.0177 |
|               |                                                                                                                        | 58    | 64  | 0.3444 |
|               |                                                                                                                        | 177   | 183 | 0.0920 |
|               |                                                                                                                        | 199   | 207 | 0.1733 |
|               |                                                                                                                        | 234   | 240 | 0.0911 |
|               |                                                                                                                        | 264   | 268 | 0.0336 |
|               |                                                                                                                        | 296   | 304 | 0.0093 |
|               |                                                                                                                        | 355   | 359 | 0.0114 |

TABLE 5: (continued)

| Swiss-Prot ID | Protein                                                       | Start | End | $r_s$  |
|---------------|---------------------------------------------------------------|-------|-----|--------|
|               |                                                               | 371   | 375 | 0.0630 |
|               |                                                               | 381   | 385 | 0.2440 |
|               |                                                               | 393   | 399 | 0.1041 |
|               |                                                               | 404   | 410 | 0.2083 |
|               |                                                               | 485   | 493 | 0.0093 |
| DHSA_ECOLI    | Succinate dehydrogenase flavoprotein subunit<br>(EC 1.3.99.1) | 31    | 39  | 0.1131 |
|               |                                                               | 93    | 97  | 0.2486 |
|               |                                                               | 134   | 138 | 0.0628 |
|               |                                                               | 142   | 150 | 0.1084 |
|               |                                                               | 162   | 166 | 0.1598 |
|               |                                                               | 181   | 187 | 0.1663 |
|               |                                                               | 188   | 192 | 0.1702 |
|               |                                                               | 261   | 265 | 0.1594 |
|               |                                                               | 381   | 389 | 0.0542 |
|               |                                                               | 477   | 481 | 0.2598 |
|               |                                                               | 556   | 560 | 0.0610 |
| FRDA_ECOLI    | Fumarate reductase flavoprotein subunit<br>(EC 1.3.99.1)      | 44    | 50  | 0.2164 |
|               |                                                               | 51    | 57  | 0.1064 |
|               |                                                               | 73    | 81  | 0.0912 |
|               |                                                               | 124   | 128 | 0.1318 |
|               |                                                               | 169   | 173 | 0.0200 |
|               |                                                               | 186   | 192 | 0.0743 |
|               |                                                               | 239   | 243 | 0.1614 |
|               |                                                               | 251   | 255 | 0.0438 |
|               |                                                               | 291   | 295 | 0.1012 |
|               |                                                               | 309   | 313 | 0.1852 |
|               |                                                               | 373   | 377 | 0.0030 |



TABLE 5: (continued)

| Swiss-Prot ID | Protein                           | Start | End | $r_s$  |
|---------------|-----------------------------------|-------|-----|--------|
| CAN_ECOLI     | Carbonic anhydrase 2 (EC 4.2.1.1) | 421   | 425 | 0.4710 |
|               |                                   | 500   | 504 | 0.2272 |
|               |                                   | 520   | 524 | 0.1200 |
|               |                                   | 550   | 554 | 0.0292 |
|               |                                   | 10    | 14  | 0.4928 |
|               |                                   | 15    | 19  | 0.4618 |
|               |                                   | 35    | 41  | 0.1310 |
|               |                                   | 58    | 62  | 0.2818 |
|               |                                   | 92    | 98  | 0.0490 |
|               |                                   | 117   | 121 | 0.3064 |
|               |                                   | 177   | 181 | 0.0720 |

Binding regions are identified through starting and ending positions along the protein sequence.

## I. REFERENCES

1. Kerner, M. J., Naylor, D. J., Ishihama, Y., Maier, T., Chang, H., Stines, A. P., Georgopoulos, C., Frishman, D., Hayer-Hartl, M., Mann, M. & Hartl, F. U. (2005). Proteome-wide Analysis of Chaperonin-Dependent Protein Folding in *Escherichia coli*. *Cell*, **122**, 209–220.
